# Supplementary material for: Microgel Particles with Distinct Morphologies and Common Chemical Compositions: A Unified Description of the Responsivity to Temperature and Osmotic Stress
Source: PubMed Central journal article supplement (PMC7709680; doi:10.3390/gels6040034), 2020-10-16
Supplement: gels-06-00034-s001.pdf [file gels-06-00034-s001.pdf]

Supplementary Materials

# Micropgel Particles with Distinct Morphologies and Common Chemical Compositions: a Unified Description of the Responsivity to Temperature and Osmotic Stress

Andrea Ruscito, Ester Chiessi, YosraToumia, Letizia Oddo, Fabio Domenici and Gaio Paradossi\*

## 1. Chemical Structures of the Dyes Used for the Labelling of PNIPAM Microgels.

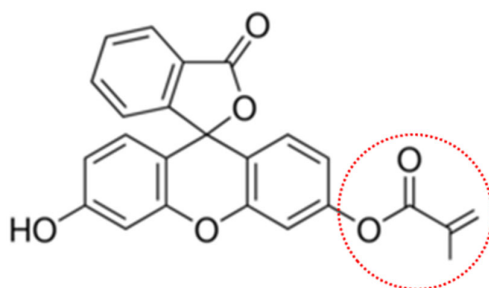

**Figure S1.** Chemical structure of fluorescein O-methacrylate (Fluo-MA): the red dotted ring highlights the (meth) acrylate moiety of the molecule exploited for the polymerization.

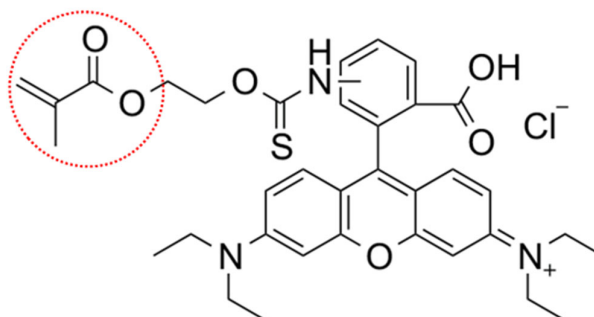

**Figure S2.** Chemical structure of methacryloxyethyl thiocarbamoyl rhodamine B (Rhod-MA): the red dotted ring highlights the (meth)acrylate moiety of the molecule exploited for the polymerization.

## 2. Testing the Reversibility of the Osmotic Effect on PNIPAM Microgels

The reversibility of all types of poly(N-isopropylacrylamide) (PNIPAM) microgels (CS\_05, CS\_01, DC\_05, DC\_01) upon osmotic stress removal was probed at 25 °C. To this aim, polyethyleneglycol (PEG), Mn 4000 (stock solution 500 mg/mL) was used as osmotically active polymer and was added to the microgels aqueous suspensions at a concentration of 5.8 % w/v, corresponding to an applied osmotic pressure of 0.36 atm. The average hydrodynamic diameter of microgel particles was monitored by dynamic light scattering (DLS) before PEG addition, upon addition of PEG and after PEG removal by centrifugation (12,000 rpm, 10 min, 2 rounds, 25 °C) and replacement of fresh deionized water, as reported in Table S1.

**Table S1.** Average hydrodynamic diameter ( $d_h$ ) of PNIPAM microgels in deionized water ( $\Pi = 0$  atm), in the presence of PEG ( $\Pi = 0.36$  atm) and after PEG removal by centrifugation ( $\Pi = 0$  atm) and replacement of supernatant with fresh deionized water; temperature = 25 °C; data from DLS measurements.

|       | $d_h$ (nm),<br>$\Pi = 0$ (Atm) | $d_h$ (nm),<br>$\Pi = 0.36$ (Atm) | $d_h$ (nm),<br>Washing, $\Pi = 0$ (Atm) |
|-------|--------------------------------|-----------------------------------|-----------------------------------------|
| CS_05 | 3100 ± 300                     | 2100 ± 300                        | 3000 ± 300                              |
| CS_01 | 3400 ± 200                     | 2200 ± 200                        | 3100 ± 300                              |
| DC_05 | 3400 ± 300                     | 1700 ± 100                        | 3200 ± 300                              |
| DC_01 | 3400 ± 300                     | 1900 ± 200                        | 3100 ± 300                              |

### 3. Dependence of PNIPAM Microgel Size on Temperature

**Table S2.** Average hydrodynamic radius ( $R_h$ ) of PNIPAM microgels as a function of temperature, from 25 °C to 45 °C: data from DLS measurements (see manuscript text for the experimental part: Section 4.9).

| Temp.<br>(°C) | CS_05                 |                       | CS_01                 |                       | DC_05                 |                       | DC_01                 |                       |
|---------------|-----------------------|-----------------------|-----------------------|-----------------------|-----------------------|-----------------------|-----------------------|-----------------------|
|               | $R_h$ (nm)<br>Heating | $R_h$ (nm)<br>Cooling | $R_h$ (nm)<br>Heating | $R_h$ (nm)<br>Cooling | $R_h$ (nm)<br>Heating | $R_h$ (nm)<br>Cooling | $R_h$ (nm)<br>Heating | $R_h$ (nm)<br>Cooling |
| 25            | 1600 ± 140            | 1600 ± 150            | 1700 ± 170            | 1700 ± 50             | 1750 ± 200            | 1600 ± 50             | 1800 ± 160            | 1600 ± 150            |
|               | 1600 ± 140            | 1500 ± 40             | 1800 ± 200            | 1600 ± 250            | 1700 ± 160            | 1600 ± 160            | 1800 ± 150            | 1800 ± 150            |
| 32            | 870 ± 100             | 800 ± 100             | 840 ± 85              | 600 ± 10              | 1150 ± 100            | 1200 ± 100            | 887 ± 130             | 740 ± 30              |
|               | 530 ± 30              | 510 ± 50              | 700 ± 50              | 490 ± 5               | 450 ± 20              | 400 ± 13              | 560 ± 18              | 470 ± 60              |
| 40            | 500 ± 40.0            | 510 ± 30              | 600 ± 140             | 500 ± 30              | 340 ± 40              | 350 ± 10              | 500 ± 30              | 520 ± 30              |
|               | 500 ± 100             | 500 ± 100             | 630 ± 4.0             | 630 ± 4.0             | 330 ± 30              | 330 ± 30              | 500 ± 60              | 520 ± 60              |

### 4. Dependence of PNIPAM Microgel Size on Osmotic Stress

**Table S3.** Osmotic pressure of the external solution ( $\Pi_{EXT}$ ) and respective shrinking ratio ( $V/V_{max}$ ) at 25 °C for PNIPAM microgels: data from DLS measurements (see manuscript text for the experimental part: Section 4.9).

| $\Pi_{EXT}$ (Atm) | $V/V_{max}$ (CS_05) | $V/V_{max}$ (CS_01) | $V/V_{max}$ (DC_05) | $V/V_{max}$ (DC_01) |
|-------------------|---------------------|---------------------|---------------------|---------------------|
| 0                 | 1.0 ± 0.6           | 1.0 ± 0.6           | 1.0 ± 0.6           | 1.0 ± 0.6           |
| 0.05              | 1.0 ± 0.6           | 1.0 ± 0.6           | 0.7 ± 0.3           | 0.8 ± 0.4           |
| 0.13              | 0.7 ± 0.6           | 0.43 ± 0.25         | 0.05 ± 0.03         | 0.5 ± 0.25          |
| 0.17              | 0.8 ± 0.4           | 0.47 ± 0.25         | 0.06 ± 0.03         | 0.3 ± 0.2           |
| 0.20              | 0.5 ± 0.3           | 0.4 ± 0.3           | 0.04 ± 0.02         | 0.3 ± 0.1           |
| 0.26              | 0.4 ± 0.3           | 0.3 ± 0.2           | 0.04 ± 0.02         | 0.2 ± 0.1           |
| 0.36              | 0.4 ± 0.2           | 0.4 ± 0.            | 0.04 ± 0.02         | 0.2 ± 0.1           |
| 0.45              |                     |                     | 0.03 ± 0.01         |                     |
| 0.55              |                     | 0.4 ± 0.2           | 0.03 ± 0.02         | 0.2 ± 0.07          |
| 0.62              | 0.3 ± 0.2           |                     | 0.03 ± 0.02         | 0.13 ± 0.06         |
| 0.75              | 0.16 ± 0.1          | 0.1 ± 0.1           | 0.02 ± 0.02         | 0.09 ± 0.05         |
| 1.0               | 0.02 ± 0.01         | 0.03 ± 0.02         | 0.02 ± 0.01         | 0.05 ± 0.02         |
| 1.2               | 0.03 ± 0.01         | 0.03 ± 0.02         | 0.02 ± 0.02         | 0.06 ± 0.03         |
| 1.8               | 0.03 ± 0.02         | 0.03 ± 0.02         | 0.03 ± 0.02         | 0.04 ± 0.02         |

## 5. PEG Aqueous Solution Viscosities at 25 °C

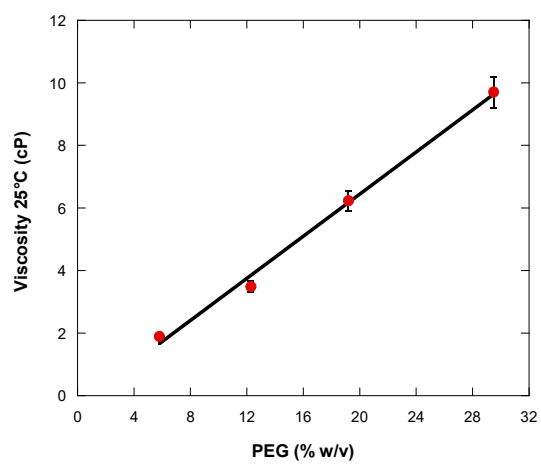

**Figure S3.** Measured PEG aqueous viscosities at 25 °C (AR 2000 rheometer TA Instruments, Milan, Italy).
